# Supplementary material for: Thiourea modified polyethylenimine for efficient gene delivery mediated by the combination of electrostatic interactions and hydrogen bonds
Source: Royal Society of Chemistry journal article supplement (doi:10.1039/c3py01781h), 2014-01-01
Supplement: c3py01781h1.pdf [file c3py01781h1.pdf]

ARTICLE

Electronic Supplementary Information

**Thiourea modified polyethylenimine for efficient gene delivery mediated by the combination of electrostatic attraction and hydrogen bond**

Yuce Li,<sup>ab</sup> Huayu Tian,<sup>a</sup> Jianxun Ding,<sup>a</sup> Xuan Dong,<sup>ab</sup> Jie Chen,<sup>a</sup> Xuesi Chen<sup>a\*</sup>

<sup>a</sup> Key Laboratory of Polymer Ecomaterials, Changchun Institute of Applied Chemistry, Chinese Academy of Sciences, Changchun 130022, P. R. China. Fax: +86 431 85262112; Tel: +86 431 85262112; E-mail: xschen@ciac.ac.cn

<sup>b</sup> University of Chinese Academy of Sciences, Beijing 100039, P. R. China

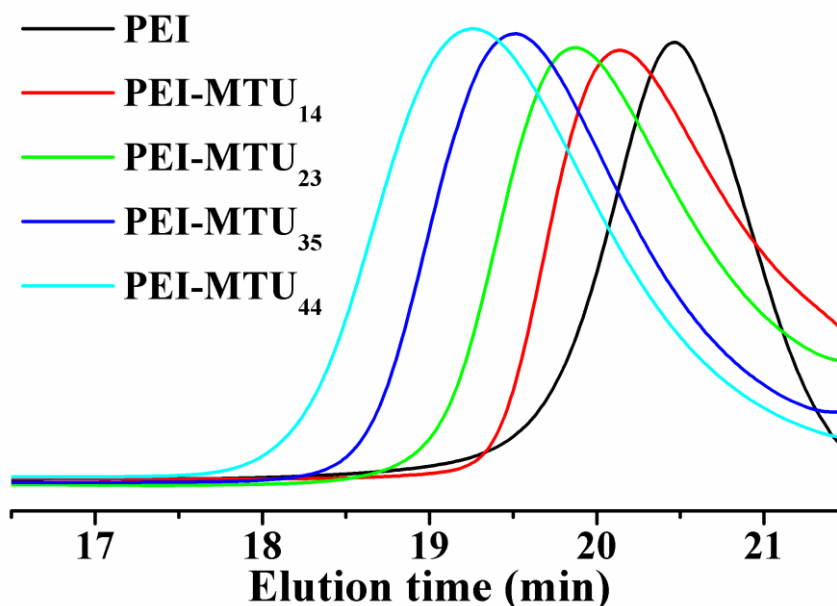

**Fig. S1** GPC chromatograms of PEI and PEI-MTUs.

**Table S1** Molecular characterizations of PEI-MTUs.

| Notes                 | Theoretical $M_n$ (kDa) | Resultant $M_n$ (kDa) | Resultant $M_w$ (kDa) | PDI  | Theoretical $M_w/M_n$ , PEI | Resultant $M_w/M_n$ , PEI |
|-----------------------|-------------------------|-----------------------|-----------------------|------|-----------------------------|---------------------------|
| PEI                   | 10.0                    | 2.40                  | 2.80                  | 1.16 | 1                           | 1                         |
| PEI-MTU <sub>14</sub> | 10.9                    | 2.60                  | 3.30                  | 1.24 | 1.09                        | 1.09                      |
| PEI-MTU <sub>23</sub> | 11.7                    | 2.90                  | 3.70                  | 1.31 | 1.17                        | 1.18                      |
| PEI-MTU <sub>35</sub> | 12.6                    | 3.10                  | 3.90                  | 1.25 | 1.26                        | 1.29                      |
| PEI-MTU <sub>44</sub> | 13.4                    | 3.40                  | 4.60                  | 1.37 | 1.34                        | 1.41                      |

All of the polymers including PEI exhibited much smaller  $M_n$ s than theoretical value. It could be explained by the following reasons: 1) PEI and PEI-MTUs were highly branched polymers that got much smaller hydrodynamic radii in solutions compared with linear polymers; 2) PEI and its derivatives contained a number of amino groups that will enhance the interaction between

polymer and column and lengthen the elution time; 3) the standard samples used in this work were linear PEGs, which were quite different from the PEI and PEI-MTUs in chemical structure.

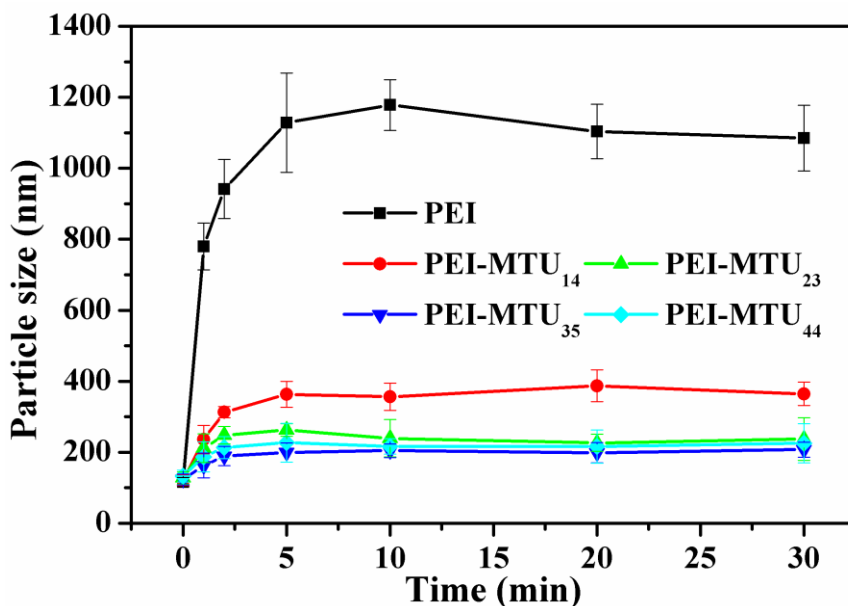

**Fig. S2** Stability of carrier/DNA complexes in the presence of BSA. Particle sizes of the complexes were determined at different time points after added into BSA solution. Data were shown as mean  $\pm$  standard deviation ( $n = 3$ ).

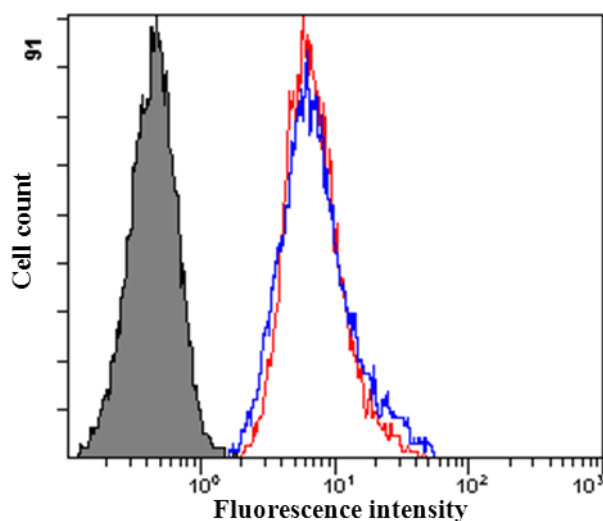

**Fig. S3** Cellular uptake analyses by flow cytometry toward HeLa cells after co-incubation for 4 h: PBS (gray), PEI/DNA (red) and PEI-MTU<sub>35</sub>/DNA (blue).

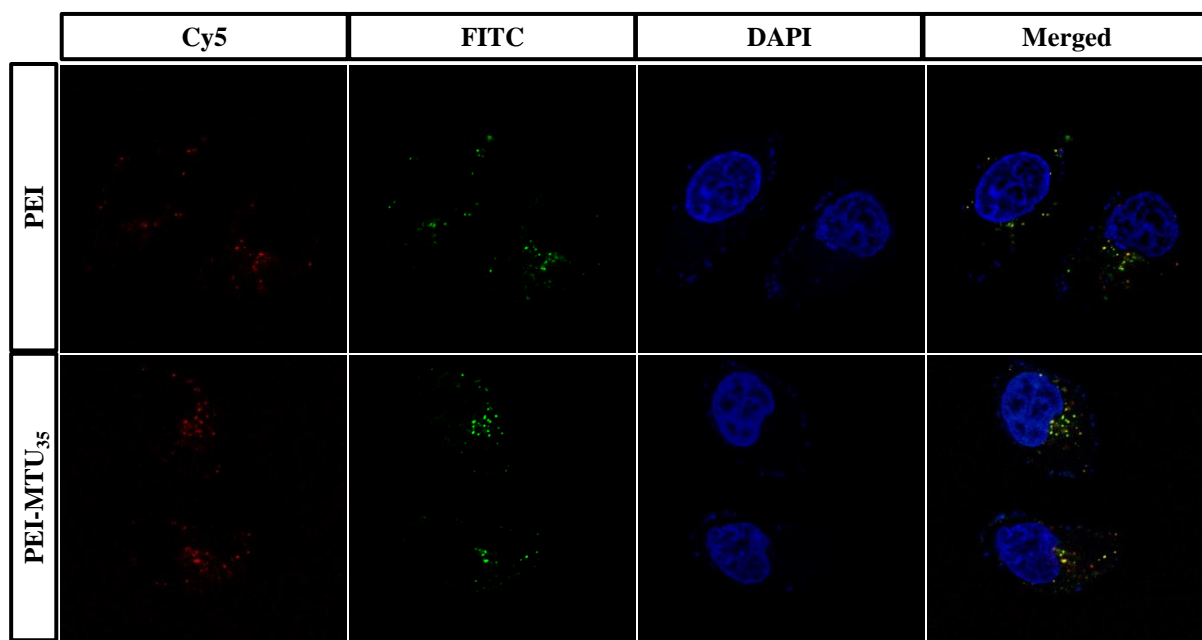

**Fig. S4** CLSM microimages of HeLa cells after incubation with PEI/pDNA or PEI-MTU<sub>35</sub>/pDNA complexes for 1 h. pDNA was labelled with Cy5, PEI and PEI-MTU<sub>35</sub> were labelled by FITC and the cell nuclei were labelled by DAPI.

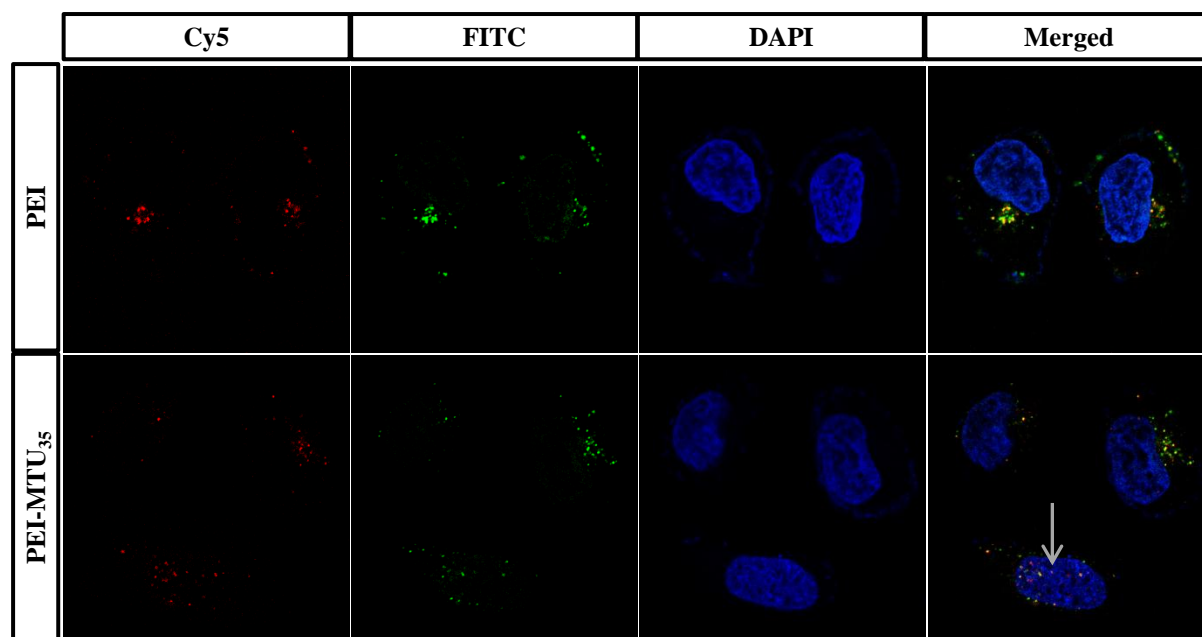

**Fig. S5** CLSM microimages of HeLa cells after incubation with PEI/pDNA or PEI-MTU<sub>35</sub>/pDNA complexes for 2 h. pDNA was labelled with Cy5, PEI and PEI-MTU<sub>35</sub> were labelled by FITC and the cell nuclei were labelled by DAPI.

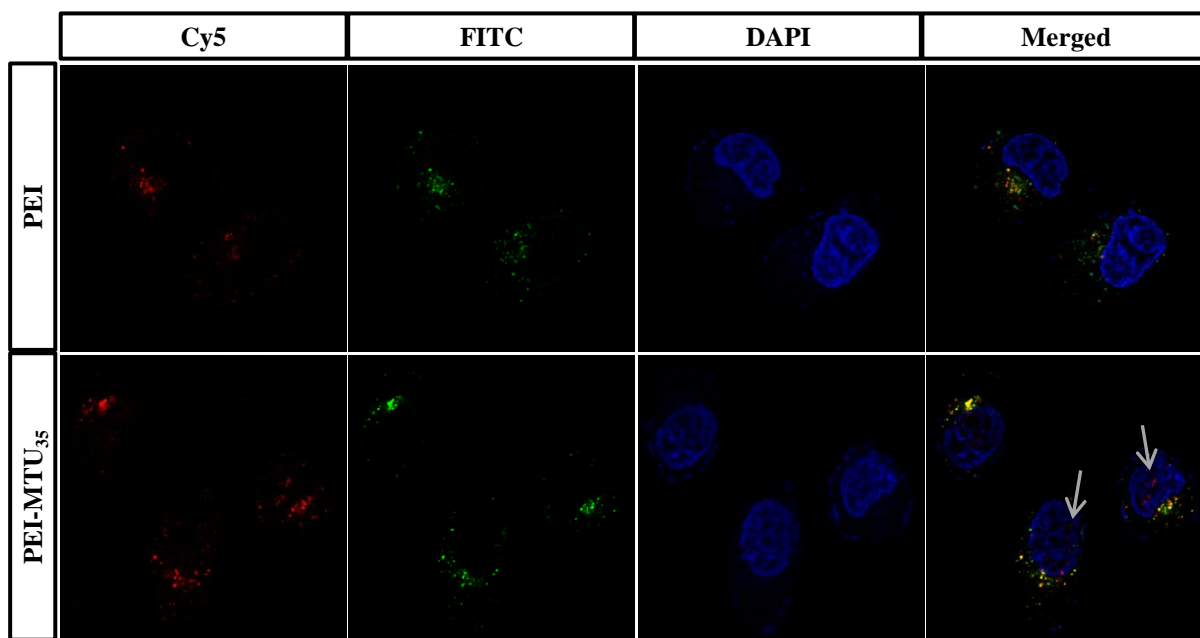

**Fig. S6** CLSM microimages of HeLa cells after incubation with PEI/pDNA or PEI-MTU<sub>35</sub>/pDNA complexes for 8 h. pDNA was labelled with Cy5, PEI and PEI-MTU<sub>35</sub> were labelled by FITC and the cell nuclei were labelled by DAPI.
